# Supplementary material
Source: Springer Nature journal article supplement (https://www.springermedizin.de/resource/supplementary/12957_2014_1603_MOESM2_ESM.pdf/9563012)

R

+C  
kV 120  
eff.mAs 138

10cm

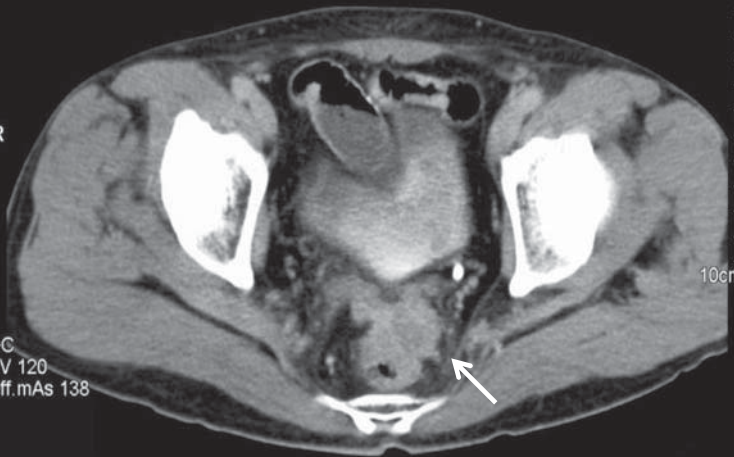

Supplement: MOESM2 [file 9563012]
